# Supplementary material for: Molecular Profiles of Advanced Urological Cancers in the PERMED-01 Precision Medicine Clinical Trial
Source: MDPI journal article supplement (doi:10.3390/cancers14092275), 2022-05-03
Supplement: s1 [file s1]

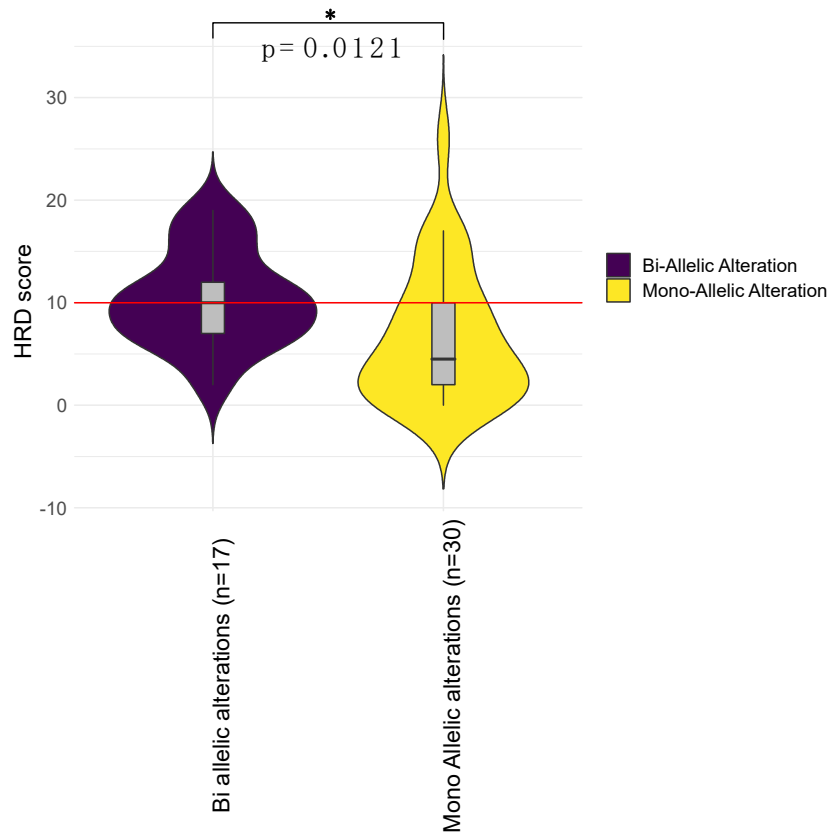

**Figure S2.** Violin plots of HRD scores in urological cancers according to the presence/absence of mono- and bi-allelic pathogenic alterations of genes involved in homologous recombination.
