# Supplementary material for: Molecular Profiles of Advanced Urological Cancers in the PERMED-01 Precision Medicine Clinical Trial
Source: Cancers (Basel). 2022 May 3;14(9):2275. doi: 10.3390/cancers14092275 (PMC9100924; doi:10.3390/cancers14092275)
Supplement: Supplementary file 1 [file cancers-14-02275-s001.zip › Table.xls]

## Sheet: Table S1
Table S1: Gene panels used in the t-NGS analysis
V7 panel	V8 panel	V10 panel	BROCA list	Genes tested in the PROfound trial
ABL1	ABL1	ABL1
ABL2	ABL2	ABL2
ACVR1B	ACVR1B	ACVR1B
ADAMTS16	ADAMTS16	ADAMTS16
ADNP	ADNP	ADNP
AFF2	AFF2	AFF2
AIP	AIP	AIP
AJUBA	AJUBA	AJUBA
AKAP9	AKAP9	AKAP9
AKT1	AKT1	AKT1	Yes
AKT2	AKT2	AKT2
AKT3	AKT3	AKT3
ALK	ALK	ALK	Yes
ALKBH6	ALKBH6	ALKBH6
ANGPT2	ANGPT2	ANGPT2
ANK3	ANK3	ANK3
APC	APC	APC	Yes
APOB	APOB	APOB
AR	AR	AR
ARHGAP35	ARHGAP35	ARHGAP35
ARID1A	ARID1A	ARID1A
ARID1B	ARID1B	ARID1B
ARID2	ARID2	ARID2
ARID5B	ARID5B	ARID5B
	ASXL1	ASXL1
ASXL2	ASXL2	ASXL2
	ASXL3	ASXL3
ATM	ATM	ATM	Yes	yes
	ATR	ATR	Yes
	ATRIP	ATRIP
ATRNL1	ATRNL1	ATRNL1
ATRX	ATRX	ATRX
		AXIN1
AXIN2	AXIN2	AXIN2	Yes
AXL	AXL	AXL
		BABAM1
BAP1	BAP1	BAP1	Yes
BARD1	BARD1	BARD1	Yes	yes
BCLAF1	BCLAF1	BCLAF1
BCOR	BCOR	BCOR
BLK	BLK	BLK
BLM	BLM	BLM
BMPR1A	BMPR1A	BMPR1A	Yes
BRAF	BRAF	BRAF
BRCA1	BRCA1	BRCA1	Yes	yes
BRCA2	BRCA2	BRCA2	Yes	yes
BRIP1	BRIP1	BRIP1	Yes	yes
BUB1B	BUB1B	BUB1B
C3ORF70	C3ORF70	C3ORF70
CACNA1S	CACNA1S	CACNA1S
CAP2	CAP2	CAP2
CASP8	CASP8	CASP8
CBFB	CBFB	CBFB
		CBLB
CCDC6	CCDC6	CCDC6
CCL2	CCL2	CCL2
CCND1	CCND1	CCND1
		CCND2
CCND3	CCND3	CCND3
		CCNE1
CCR4	CCR4	CCR4
CD22	CD22	CD22
CD248	CD248	CD248
CD33	CD33	CD33
CD38	CD38	CD38
CD3E	CD3E	CD3E
CD3G	CD3G	CD3G
CD4	CD4	CD4
CD40	CD40	CD40
CD52	CD52	CD52
CD70	CD70	CD70
CD74	CD74	CD74
CDC27	CDC27	CDC27
CDC73	CDC73	CDC73
CDH1	CDH1	CDH1	Yes
		CDK12	Yes	yes
CDK4	CDK4	CDK4	Yes
		CDK6
CDKN1B	CDKN1B	CDKN1B
CDKN1C	CDKN1C	CDKN1C
CDKN2A	CDKN2A	CDKN2A	Yes
CDKN2B	CDKN2B	CDKN2B
		CDKN2C
CEBPA	CEBPA	CEBPA
CENPF	CENPF	CENPF
CEP57	CEP57	CEP57
CHD4	CHD4	CHD4
	CHEK1	CHEK1	Yes	yes
CHEK2	CHEK2	CHEK2	Yes	yes
		CIC
CMYA5	CMYA5	CMYA5
		CNOT3
COL6A3	COL6A3	COL6A3
CRB1	CRB1	CRB1
CREBBP	CREBBP	CREBBP
CSF1R	CSF1R	CSF1R
CSMD3	CSMD3	CSMD3
CTCF	CTCF	CTCF
CTGF	CTGF	CTGF
CTLA4	CTLA4	CTLA4
	CTNNA1	CTNNA1	Yes
CTNNB1	CTNNB1	CTNNB1
CUL3	CUL3	CUL3
CUX1	CUX1	CUX1
CYLD	CYLD	CYLD
DDB2	DAXX	DAXX
DDR1	DDB2	DDB2
DDR2	DDR1	DDR1
DIAPH1	DDR2	DDR2
	DIAPH1	DIAPH1
DICER1	DICER1	DICER1	Yes
DIS3L2	DIS3L2	DIS3L2
DLL4	DLL4	DLL4
DMD	DMD	DMD
	DNA2	DNA2
DNER	DNER	DNER
DNMT3A	DNMT3A	DNMT1
DSCAM	DSCAM	DNMT3A
		DNMT3B
		DSCAM
DYNC1H1	DYNC1H1	DYNC1H1
		ECT2L
EGFL7	EGFL7	EGFL7
EGFR	EGFR	EGFR
		EIF1AX
EIF2S2	EIF2S2	EIF2S2
ELF3	ELF3	ELF3
	EME1	EME1
	EME2	EME2
EP300	EP300	EP300
EPCAM	EPCAM	EPCAM
EPHA2	EPHA2	EPHA2
		EPHA3
		EPHA5
EPHB2	EPHB2	EPHB2
ERBB2	ERBB2	ERBB2
	ERBB2IP	ERBB2IP
ERBB3	ERBB3	ERBB3
ERBB4	ERBB4	ERBB4
	ERCC1	ERCC1
ERCC2	ERCC2	ERCC2
ERCC3	ERCC3	ERCC3
ERCC4	ERCC4	ERCC4
ERCC5	ERCC5	ERCC5
ESR1	ESR1	ESR1
	EXO1	EXO1
EXT1	EXT1	EXT1
EXT2	EXT2	EXT2
EZH2	EZH2	EZH2
EZR	EZR	EZR
FAM123B	FAM123B	FAM123B
FAM135B	FAM135B	FAM135B
	FAM175A	FAM175A
FANCA	FANCA	FANCA
FANCB	FANCB	FANCB
FANCC	FANCC	FANCC
FANCD2	FANCD2	FANCD2
FANCE	FANCE	FANCE
FANCF	FANCF	FANCF
FANCG	FANCG	FANCG
FANCI	FANCI	FANCI
FANCL	FANCL	FANCL		yes
FANCM	FANCM	FANCM	Yes
FAT1	FAT1	FAT1
FBXW7	FBXW7	FBXW7
	FEN1	FEN1
FES	FES	FES
FGFR1	FGFR1	FGFR1
FGFR2	FGFR2	FGFR2
FGFR3	FGFR3	FGFR3
FGFR4	FGFR4	FGFR4
FGR	FGR	FGR
FH	FH	FH	Yes
FLCN	FLCN	FLCN	Yes
FLT1	FLT1	FLT1
FLT3	FLT3	FLT3
FLT4	FLT4	FLT4
FNTA	FNTA	FNTA
FOXA1	FOXA1	FOXA1
		FOXP1
FOXQ1	FOXQ1	FOXQ1
FRK	FRK	FRK
FUBP1	FUBP1	FUBP1
FYN	FYN	FYN
FZD7	FZD7	FZD7
	GALNT12	GALNT12	Yes
GATA1	GATA1	GATA1
GATA2	GATA2	GATA2
GATA3	GATA3	GATA3
		GATA6
	GEN1	GEN1	Yes
GNAS	GNAS	GNAS
GNPTAB	GNPTAB	GNPTAB
GOT1	GOT1	GOT1
GPC3	GPC3	GPC3
GPNMB	GPNMB	GPNMB
GPR149	GPR149	GPR149
	GREM1	GREM1	Yes
GRM1	GRM1	GRM1
	H2AFX	H2AFX
	H3F3A	H3F3A
HCK	HCK	HCK
HEATR5B	HEATR5B	HEATR5B
HGF	HGF	HGF
HLA-A
HLA-B
HLA-DRB5
HNF1A	HNF1A	HNF1A
	HOXB13	HOXB13	Yes
HRAS	HRAS	HRAS
HSPG2	HSPG2	HSPG2
	HUS1	HUS1
ICAM1	ICAM1	ICAM1
IDH1	IDH1	IDH1
IDH2	IDH2	IDH2
IGF1R	IGF1R	IGF1R
IGSF10	IGSF10	IGSF10
IL12A	IL12A	IL12A
IL12B	IL12B	IL12B
IL1B	IL1B	IL1B
IL23A	IL23A	IL23A
IL2RA	IL2RA	IL2RA
IL2RB	IL2RB	IL2RB
IL6R	IL6R	IL6R
ING1	ING1	ING1
	INO80	INO80
INPPL1	INPPL1	INPPL1
IPO7	IPO7	IPO7
IRF6	IRF6	IRF6
ITGA4	ITGA4	ITGA4
ITGAL	ITGAL	ITGAL
ITGAV	ITGAV	ITGAV
ITK	ITK	ITK
JAK1	JAK1	JAK1
JAK2	JAK2	JAK2
JAK3	JAK3	JAK3
		KDM5C
KDM6A	KDM6A	KDM6A
KDR	KDR	KDR
KEAP1	KEAP1	KEAP1
KIT	KIT	KIT
KLHL8	KLHL8	KLF4
		KLHL8
		KMT2A
		KMT2B
KRAS	KRAS	KRAS
	L3MBTL3	L3MBTL3
L3MBTL4	L3MBTL4	L3MBTL4
LCK	LCK	LCK
LCP1	LCP1	LCP1
	LIG1	LIG1
	LIG3	LIG3
	LIG4	LIG4
	LRP1B	LRP1B
LRP1B	LRRC1	LRRC1
LRRC7	LRRC7	LRRC7
LTK	LTK	LTK
LYN	LYN	LYN
MADD		MAD2L2
MAP2	MADD	MADD
	MAP2	MAP2
MAP2K1	MAP2K1	MAP2K1
		MAP2K2
MAP2K4	MAP2K4	MAP2K4
MAP3K1	MAP3K1	MAP3K1
MAP3K10	MAP3K10	MAP3K10
MAP3K13	MAP3K13	MAP3K13
MAP3K4	MAP3K4	MAP3K4
		MAP3K9
MAP4K3	MAP4K3	MAP4K3
MAPK1	MAPK1	MAPK1
MAX	MAX	MAX
MBD1	MBD1	MBD1
MBTPS1	MBTPS1	MBTPS1
	MDC1	MDC1
		MDM2
MDN1	MDN1	MDN1
		MECOM
		MED12
		MED23
MEN1	MEN1	MEN1	Yes
MET	MET	MET	Yes
MGA	MGA	MGA
MICALCL	MICALCL	MICALCL
	MINK1	MINK1
	MITF	MITF	Yes
MLH1	MLH1	MLH1	Yes
	MLH3	MLH3	Yes
MLIP	MLIP	MLIP
MLL	MLL
MLL2	MLL2
MLL3	MLL3	MLL3
MLLT4	MLLT4	MLLT4
	MMS22L	MMS22L
MORC4	MORC4	MORC4
	MRE11A	MRE11A	Yes
MS4A1	MS4A1	MS4A1
MSH2	MSH2	MSH2	Yes
	MSH3	MSH3	Yes
MSH6	MSH6	MSH6	Yes
MSLN	MSLN	MSLN
MST1R	MST1R	MST1R
MTOR	MTOR	MTOR
		MTUS1
MUC1	MUC1	MUC1
MUC16
	MUS81	MUS81
MUTYH	MUTYH	MUTYH	Yes
MXRA5	MXRA5	MXRA5
MYB	MYB	MYB
MYCN	MYCN	MYC
		MYCL1
		MYCN
MYH2	MYH2	MYH2
MYH9	MYH9	MYH9
		NAV3
NBN	NBN	NBN	Yes
NBPF1	NBPF1	NBPF1
NCAM1	NCAM1	NCAM1
NCOR1	NCOR1	NCOR1
NCOR2	NCOR2	NCOR2
NEB	NEB	NEB
NF1	NF1	NF1	Yes
NF2	NF2	NF2	Yes
NFE2L2	NFE2L2	NFE2L2
NGF	NGF	NGF
	NHEJ1	NHEJ1
		NKX2-1
NOTCH1	NOTCH1	NOTCH1
NOTCH2	NOTCH2	NOTCH2
NOTCH3	NOTCH3	NOTCH3
NOTCH4	NOTCH4	NOTCH4
		NOV
NR1I2	NR1I2	NR1I2
NRAS	NRAS	NRAS
NSD1	NSD1	NSD1
	NSMCE1	NSMCE1
	NSMCE2	NSMCE2
	NSMCE4A	NSMCE4A
NTN4	NTN4	NTN4
NTRK1	NTRK1	NTRK1
NTRK2	NTRK2	NTRK2
NTRK3	NTRK3	NTRK3
OTUD7A	OTUD7A	OTUD7A
PALB2	PALB2	PALB2	Yes	yes
		PARD3
PARP1	PARP1	PARP1
	PARP2	PARP2
	PARP3	PARP3
	PARP4	PARP4
	PARP9	PARP9
		PBRM1
PCBP1	PCBP1	PCBP1
	PCNA	PCNA
PDCD1	PDCD1	PDCD1
PDGFRA	PDGFRA	PDGFRA	Yes
PDGFRB	PDGFRB	PDGFRB
		PHF6
PHOX2B	PHOX2B	PHOX2B	Yes
	PIF1	PIF1
PIGF	PIGF	PIGF
PIK3CA	PIK3CA	PIK3CA	Yes
PIK3CB	PIK3CB	PIK3CB
PIK3CD	PIK3CD	PIK3CD
PIK3CG	PIK3CG	PIK3CG
PIK3R1	PIK3R1	PIK3R1
		PINK1
PLK1	PLK1	PLK1
PMS1	PMS1	PMS1
PMS2	PMS2	PMS2	Yes
	POLA1	POLA1
	POLD1	POLD1	Yes
	POLD2	POLD2
	POLD3	POLD3
	POLD4	POLD4
POLE	POLE	POLE	Yes
		POLQ
PPM1D	PPM1D	PPM1D
PPP2R1A	PPP2R1A	PPP2R1A
PPP2R5C	PPP2R5C	PPP2R5C
		PRDM1
		PREX2
PRF1	PRF1	PRF1
	PRICKLE1	PRICKLE1
	PRICKLE2	PRICKLE2
PRKAR1A	PRKAR1A	PRKAR1A	Yes
PRKCB	PRKCB	PRKCB
PRKCE	PRKCE	PRKCE
PRKCG	PRKCG	PRKCG
PRKCH	PRKCH	PRKCH
PRKCQ	PRKCQ	PRKCQ
	PRKDC	PRKDC
	PRSS1	PRSS1	Yes
PSMB5	PSMB5	PSMB5
PSMC3IP	PSMC3IP	PSMC3IP
PTCH1	PTCH1	PTCH1	Yes
		PTCH2
PTEN	PTEN	PTEN	Yes
PTK2	PTK2	PTK2
	PTK7	PTK7
PTPN11	PTPN11	PTPN11
PTPRD	PTPRD	PTPRD
RAC1	RAC1	RAC1
	RAD1	RAD1
	RAD17	RAD17
	RAD18	RAD18
	RAD50	RAD50
	RAD51	RAD51
	RAD51AP1	RAD51AP1
	RAD51B	RAD51B	Yes	yes
RAD51C	RAD51C	RAD51C	Yes	yes
RAD51D	RAD51D	RAD51D	Yes	yes
	RAD52	RAD52
	RAD54B	RAD54B
	RAD54L	RAD54L		yes
	RAD9A	RAD9A
	RAD9B	RAD9B
RAF1	RAF1	RAF1
RASA1	RASA1	RASA1
RB1	RB1	RB1	Yes
RBM10	RBBP8	RBBP8
	RBM10	RBM10
	RECQL	RECQL	Yes
RECQL4	RECQL4	RECQL4
	RECQL5	RECQL5
RET	RET	RET	Yes
	REV1	REV1
	REV3L	REV3L
	RFC1	RFC1
	RFC2	RFC2
	RFC3	RFC3
	RFC4	RFC4
	RFC5	RFC5
RHBDF2	RHBDF2	RHBDF2
RHOA	RHOA	RHOA
		RIF1
RIT1	RIT1	RIT1
		RNF43	Yes
		RNF8
		ROBO1
		ROBO2
	ROR1	ROR1
	ROR2	ROR2
ROS1	ROS1	ROS1
	RPA1	RPA1
	RPA2	RPA2
	RPA3	RPA3
	RPA4	RPA4
RPS6KC1	RPS6KC1	RPL22
		RPS6KC1
RSBN1L	RSBN1L	RSBN1L
	RTEL1	RTEL1
RUNX1	RUNX1	RUNX1
	RUNX2	RUNX2
RUNX3	RUNX3	RUNX3
RXRA	RXRA	RXRA
SACS	SACS	SACS
SBDS	SBDS	SBDS
	SCRIB	SCRIB
	SDHA	SDHA
SDHAF2	SDHAF2	SDHAF2
SDHB	SDHB	SDHB	Yes
SDHC	SDHC	SDHC	Yes
SDHD	SDHD	SDHD	Yes
SELP	SELP	SELP
		SETD2
SF3B1	SF3B1	SF3B1
SGK1	SGK1	SGK1
SIRT1	SIRT1	SIRT1
SIRT4	SIRT4	SIRT4
SLAMF7	SLAMF7	SLAMF7
SLC1A3	SLC1A3	SLC1A3
SLC44A3	SLC44A3	SLC44A3
SLC4A5	SLC4A5	SLC4A5
		SLIT2
	SLX1A	SLX1A
SLX4	SLX4	SLX4
SMAD2	SMAD2	SMAD2
SMAD4	SMAD4	SMAD4
SMARCA4	SMARCA4	SMARCA4	Yes
	SMARCA5	SMARCA5
	SMARCAD1	SMARCAD1
		SMARCAL1
SMARCB1	SMARCB1	SMARCB1
SMO	SMO	SMO
SNX25	SNX25	SNX25
SOS1	SOS1	SOS1
SOX17	SOX17	SOX17
		SOX9
		SPEN
SPOP	SPOP	SPOP
SRC	SRC	SRC
STAG2	STAG2	STAG2
	STAT3	STAT3
STAT5B	STAT5B	STAT5B
STK11	STK11	STK11
STX2	STX2	STX2
SUFU	SUFU	SUFU
		TAF1
TAP1	TAP1	TAP1
TBC1D1	TBC1D1	TBC1D1
TBL1XR1	TBL1XR1	TBL1XR1
TBX3	TBX3	TBX3
TCF7L2	TCF7L2	TCF7L2
TCP11L2	TCP11L2	TCP11L2
	TDP1	TDP1
TEK	TEK	TEK
	TERT	TERT
		TET1
		TET2
		TET3
TGFB2	TGFB2	TGFB2
TGFB3	TGFB3	TGFB3
TGFBR2	TGFBR2	TGFBR2
TMEM127	TMEM127	TMEM127
TNFRSF10A	TNFRSF10A	TNFRSF10A
TNFRSF10B	TNFRSF10B	TNFRSF10B
TNFRSF11A	TNFRSF11A	TNFRSF11A
TNFRSF12A	TNFRSF12A	TNFRSF12A
TNFRSF8	TNFRSF8	TNFRSF8
TNFRSF9	TNFRSF9	TNFRSF9
TNFSF13B	TNFSF13B	TNFSF13B
TP53	TP53	TP53	Yes
		TP53BP1
TPX2	TPX2	TPX2
TRIM23	TRIM23	TRIM23
TRPC1	TRPC1	TRPC1
TSC1	TSC1	TSC1	Yes
TSC2	TSC2	TSC2	Yes
TTLL9	TTLL9	TTLL9
TXNDC8	TXNDC8	TXNDC8
U2AF1	U2AF1	U2AF1
		UBE2N
		UIMC1
USH2A	USH2A	USH2A
		USP9X
	VANGL1	VANGL1
	VANGL2	VANGL2
VEGFA	VEGFA	VEGFA
VEGFB	VEGFB	VEGFB
VHL	VHL	VHL	Yes
		WEE1
WRN	WRN	WRN
WT1	WT1	WT1
		XBP1
XPA	XPA	XPA
XPC	XPC	XPC
	XRCC1	XRCC1
	XRCC2	XRCC2
	XRCC3	XRCC3
	XRCC4	XRCC4
	XRCC5	XRCC5
	XRCC6	XRCC6
YES1	YES1	YES1
ZFHX3	ZFHX3	ZFHX3
		ZFP36L1
ZHX2	ZHX2	ZHX2
		ZMYND10
		ZNF217
ZNF471	ZNF471	ZNF471
ZNF620	ZNF620	ZNF620
	ZNF703	ZNF703
ZNF750	ZNF750	ZNF750
	ZNRF3	ZNRF3
ZRANB3	ZRANB3	ZRANB3

## Sheet: Table S2
Table S2: Pathogenic germline variants identified
Genes	Patients	Germline mutations	Relevant somatic alteration on this gene	Primary tumor	Oncogenetics consultation before	Oncogenetics consultation recommended by	Oncogenetics consultation done after PERMED-01 (cause if not)
	with PGV			(age at diagnosis, sex)	PERMED-01	PERMED-01
	(N)
ATM	1	c.4396C>T p.Arg1466*	Loss of ATM (log2 ratio = -0.32)	Bladder (61, F)	N	NA	NA
NM_000051		VAFGERM = 26%
		VAFTUM = 30%
BRCA2	1	c.3698_3699del p.L1234Afs*8	Loss of BRCA2 (log2 ratio = -0.66)	Prostate (61, H)	N	Yes	Yes
NM_000059		VAFTUM = 81%	High HRD score				(confirmation of germline mutation)
CHEK2	1	c.470T>C, p.Ile157Thr		Kidney (56, M)	N	No	NA
NM_007194		VAFGERM = 48%
		VAFTUM = 39%
NBN	1	c.657_661del, p.Lys219Asnfs*16	High HRD score	Prostate (66, M)	N	Yes	No
NM_002485		VAFGERM = 59%					(deceased)
		VAFTUM = 71%

## Sheet: Table S3
Table S3: Systelmic therapies 2 received by patients in the “matched therapy” and "non-matched therapy" groups
Matched therapy 2	Age range at inclusion [10-year range]	Sex	ECOG PS at inclusion	Cancer type	Pathological type	Extension stage at inclusion	Ttype of therapy 2
yes	[70-79]	M	0	Bladder-Ureter	Carcinoma	Metastatic	BGJ-398
yes	[60-69]	M	1	Prostate	Carcinoma	Metastatic	OLAPARIB
yes	[70-79]	M	0	Prostate	Carcinoma	Metastatic	SORAFENIB
yes	[60-69]	M	0	Prostate	Carcinoma	Metastatic	TRASTUZUMAB
yes	[60-69]	M	0	Prostate	Carcinoma	Metastatic	PEMBROLIZUMAB + OLAPARIB
yes	[70-79]	M	2	Prostate	Carcinoma	Metastatic	EVEROLIMUS
yes	[60-69]	M	1	Bladder-Ureter	Carcinoma	Metastatic	SORAFENIB
yes	[70-79]	M	1	Prostate	Carcinoma	Metastatic	EVEROLIMUS
yes	[50-59]	M	0	Prostate	Carcinoma	Metastatic	EVEROLIMUS
yes	[70-79]	M	0	Prostate	Carcinoma	Metastatic	OLAPARIB
yes	[70-79]	M	0	Prostate	Carcinoma	Metastatic	OLAPARIB
yes	[80-89]	M	1	Prostate	Carcinoma	Metastatic	EVEROLIMUS
no	[40-49]	M	0	Testis	Germ cell tumour	Metastatic	CABAZITAXEL
no	[30-39]	M	1	Testis	Germ cell tumour	Metastatic	GEMCITABINE + OXALIPLATINE
no	[80-89]	M	1	Prostate	Carcinoma	Metastatic	ABIRATERONE + PREDNISONE
no	[70-79]	F	0	Kidney	Carcinoma	Metastatic	SORAFENIB
no	[50-59]	F	0	Bladder-Ureter	Carcinoma	Metastatic	CARBOPLATINE + 5FU
no	[60-69]	M	0	Prostate	Carcinoma	Metastatic	CABAZITAXEL
no	[60-69]	M	1	Prostate	Carcinoma	Metastatic	DOCETAXEL
no	[50-59]	M	2	Kidney	Carcinoma	Metastatic	SORAFENIB
no	[60-69]	M	NA	Prostate	Carcinoma	Metastatic	MITOXANTRONE
no	[60-69]	M	NA	Prostate	Carcinoma	Metastatic	CYCLOPHOSPHAMIDE
no	[60-69]	F	1	Kidney	Carcinoma	Metastatic	PAZOPANIB
no	[70-79]	M	0	Kidney	Carcinoma	Metastatic	PAZOPANIB
no	[60-69]	M	0	Prostate	Carcinoma	Metastatic	ABIRATERONE +PREDNISONE
no	[50-59]	M	0	Bladder-Ureter	Carcinoma	Metastatic	MVAC
no	[70-79]	M	0	Prostate	Carcinoma	Metastatic	ABIRATERONE +PREDNISONE
no	[60-69]	M	0	Bladder-Ureter	Carcinoma	Locally advanced	MVAC
no	[60-69]	F	0	Bladder-Ureter	Carcinoma	Metastatic	CARBOPLATINE + GEMCITABINE
no	[70-79]	M	1	Prostate	Carcinoma	Metastatic	ENZALUTAMIDE
no	[70-79]	M	0	Testis	Other	Metastatic	PEMBROLIZUMAB
no	[20-29]	F	1	Kidney	Other	Metastatic	NIVOLUMAB
no	[50-59]	M	0	Kidney	Carcinoma	Metastatic	CABOZANTINIB
no	[70-79]	F	1	Kidney	Carcinoma	Metastatic	EVEROLIMUS
no	[50-59]	M	0	Prostate	Carcinoma	Metastatic	DOCETAXEL
no	[70-79]	M	1	Prostate	Carcinoma	Metastatic	ESTRAMUSTINE + ENDOXAN
no	[70-79]	M	0	Prostate	Carcinoma	Metastatic	DOCETAXEL

## Sheet: Table S4
	Table S4: Univariate analysis for PFS2/PFS1 ratio ≥1.3 in patients treated for disease progression after enrollment.
	Characteristics			PFS2/PFS1		p-values
			N	<1.3 (N=28)	≥1.3 (N=6)
	Age, years
		Median (range)	34	65.5 (28-83)	70.5 (61-79)	0.258
	Sex					0.562
		Female	6	6 (21%)	0 (0%)
		Male	28	22 (79%)	6 (100%)
	ECOG performance status					1
		0	18	14 (54%)	4 (67%)
		1	12	10 (38%)	2 (33%)
		2	2	2 (8%)	0 (0%)
	Cancer type					0.515
		Prostate	21	15 (54%)	6 (100%)
		Kidney	6	6 (21%)	0 (0%)
		Testicular	2	2 (7%)	0 (0%)
		Bladder-Ureter	5	5 (18%)	0 (0%)
	Site of the biopsy					0.775
		Other	4	3 (12%)	1 (17%)
		Liver	10	8 (31%)	2 (33%)
		Lymph node	7	6 (23%)	1 (17%)
		Lung	5	5 (19%)	0 (0%)
		Prostate	6	4 (15%)	2 (33%)
	Pathological type					1
		Carcinoma	31	25 (89%)	6 (100%)
		Other	1	1 (4%)	0 (0%)
		Germ cell tumor	2	2 (7%)	0 (0%)
	Extension stage
		Mestastatic	34	28 (100%)	6 (100%)
	Number of metastatic sites
		Median (range)	34	2 (1-4)	1.5 (1-4)	0.109
	Number of previous treatment lines for advanced disease
		Median (range)	34	3.5 (1-9)	3.5 (1-6)	0.982
	Type of TRT2					1.36E-02
		matched	12	7 (25%)	5 (83%)
		non-matched	22	21 (75%)	1 (17%)
